# Supplementary material
Source: Springer Nature journal article supplement (https://www.springermedizin.de/resource/supplementary/13075_2013_4176_MOESM7_ESM.pdf/9696268)
Supplement: MOESM7 [file 9696268]

| GS/<br>PD | No | R/L | Finger   |       | Wrist  |    |     | Elbow  |    |     | Shoulder  | Knee |     |     | Ankle |    | Toe    | Total |
|-----------|----|-----|----------|-------|--------|----|-----|--------|----|-----|-----------|------|-----|-----|-------|----|--------|-------|
|           |    |     | Palmer   |       | Dorsal |    |     | Flexor |    | Ext | Posterior | Ext  | Med | Lat | Ext   |    | Dorsal |       |
|           |    |     | PIP (IP) | MCP   | RC     | IC | DRU | HR     | HU | HU  | GH        | SPR  | FT  | FT  | TT    | MT | MTP    |       |
|           |    |     | 12345    | 12345 | RC     | IC | DRU | HR     | HU | HU  | GH        | SPR  | FT  | FT  | TT    | MT | 12345  |       |
| 1         | R  |     | 0        | 0     | 0      | 0  | 0   | 0      | 0  | 0   | 0         | 0    | 0   | 0   | 0     | 0  | 0      | 0     |
|           | L  |     | 0        | 0     | 0      | 0  | 0   | 0      | 0  | 0   | 0         | 0    | 0   | 0   | 0     | 0  | 0      | 0     |
| 2         | R  |     | 1        | 2     | 2      | 0  | 0   | 0      | 0  | 0   | 0         | 0    | 0   | 0   | 0     | 0  | 0      | 0     |
|           | L  |     | 1        | 1     | 2      | 1  | 0   | 0      | 0  | 0   | 0         | 0    | 0   | 0   | 0     | 0  | 0      | 0     |
| 3         | R  |     | 0        | 0     | 0      | 0  | 0   | 0      | 0  | 0   | 0         | 0    | 0   | 0   | 0     | 0  | 0      | 0     |
|           | L  |     | 0        | 0     | 0      | 0  | 0   | 0      | 0  | 0   | 0         | 0    | 0   | 0   | 0     | 0  | 0      | 0     |
| 4         | R  |     | 0        | 0     | 0      | 0  | 0   | 0      | 1  | 0   | 0         | 0    | 0   | 0   | 0     | 0  | 0      | 0     |
|           | L  |     | 0        | 0     | 0      | 0  | 0   | 0      | 0  | 0   | 0         | 0    | 0   | 0   | 0     | 0  | 0      | 0     |
| 5*        | R  |     | 2        | 3     | 3      | 2  | 1   | 2      | 3  | 2   | 2         | 0    | 3   | 2   | 2     | 1  | 0      | 2     |
|           | L  |     | 3        | 2     | 2      | 3  | 2   | 1      | 2  | 0   | 0         | 0    | 3   | 3   | 2     | 1  | 0      | 1     |
| 5**       | R  |     | 0        | 2     | 0      | 1  | 1   | 0      | 1  | 0   | 0         | 0    | 0   | 0   | 0     | 0  | 0      | 1     |
|           | L  |     | 0        | 0     | 0      | 0  | 2   | 1      | 0  | 1   | 0         | 0    | 0   | 0   | 0     | 0  | 0      | 0     |
| 6*        | R  |     | 0        | 1     | 1      | 2  | 1   | 0      | 0  | 0   | 0         | 0    | 2   | 0   | 0     | 0  | 0      | 0     |
|           | L  |     | 1        | 2     | 3      | 2  | 1   | 0      | 0  | 0   | 0         | 0    | 1   | 0   | 0     | 0  | 0      | 0     |
| 6**       | R  |     | 0        | 1     | 0      | 1  | 1   | 0      | 0  | 0   | 0         | 0    | 1   | 0   | 0     | 0  | 0      | 0     |
|           | L  |     | 0        | 2     | 1      | 1  | 1   | 0      | 0  | 0   | 0         | 0    | 0   | 0   | 0     | 0  | 0      | 0     |
| 7         | R  |     | 0        | 0     | 0      | 1  | 1   | 0      | 0  | 0   | 0         | 0    | 3   | 2   | 3     | 0  | 0      | 0     |
|           | L  |     | 0        | 1     | 0      | 0  | 1   | 0      | 0  | 0   | 0         | 0    | 3   | 2   | 3     | 0  | 0      | 0     |
| 8         | R  |     | 1        | 3     | 3      | 2  | 1   | 2      | 0  | 0   | 1         | 0    | 1   | 1   | 1     | 0  | 0      | 1     |
|           | L  |     | 1        | 3     | 3      | 2  | 1   | 1      | 0  | 1   | 1         | 0    | 0   | 0   | 1     | 0  | 0      | 1     |
| 9         | R  |     | 0        | 1     | 1      | 0  | 1   | 0      | 0  | 0   | 0         | 0    | 0   | 0   | 0     | 1  | 0      | 0     |
|           | L  |     | 0        | 1     | 0      | 0  | 0   | 0      | 0  | 0   | 0         | 0    | 0   | 0   | 0     | 0  | 0      | 0     |
| 10        | R  |     | 1        | 2     | 2      | 2  | 1   | 0      | 0  | 0   | 0         | 0    | 2   | 0   | 0     | 1  | 0      | 0     |
|           | L  |     | 0        | 2     | 2      | 2  | 1   | 0      | 0  | 0   | 0         | 0    | 1   | 0   | 0     | 0  | 0      | 0     |
| 1         | R  |     | 0        | 0     | 0      | 0  | 0   | 0      | 0  | 0   | 0         | 0    | 0   | 0   | 0     | 0  | 0      | 0     |
|           | L  |     | 0        | 0     | 0      | 0  | 0   | 0      | 0  | 0   | 0         | 0    | 0   | 0   | 0     | 0  | 0      | 0     |
| 2         | R  |     | 1        | 0     | 1      | 0  | 0   | 0      | 0  | 0   | 0         | 0    | 0   | 0   | 0     | 0  | 0      | 0     |
|           | L  |     | 0        | 0     | 0      | 0  | 0   | 0      | 0  | 0   | 0         | 0    | 0   | 0   | 0     | 0  | 0      | 0     |
| 3         | R  |     | 0        | 0     | 0      | 0  | 0   | 0      | 0  | 0   | 0         | 0    | 0   | 0   | 0     | 0  | 0      | 0     |
|           | L  |     | 0        | 0     | 0      | 0  | 0   | 0      | 0  | 0   | 0         | 0    | 0   | 0   | 0     | 0  | 0      | 0     |
| 4         | R  |     | 0        | 0     | 0      | 0  | 0   | 0      | 0  | 0   | 0         | 0    | 0   | 0   | 0     | 0  | 0      | 0     |
|           | L  |     | 0        | 0     | 0      | 0  | 0   | 0      | 0  | 0   | 0         | 0    | 0   | 0   | 0     | 0  | 0      | 0     |
| 5*        | R  |     | 0        | 3     | 3      | 1  | 2   | 0      | 2  | 0   | 2         | 0    | 3   | 2   | 2     | 0  | 0      | 2     |
|           | L  |     | 3        | 2     | 2      | 3  | 1   | 2      | 1  | 0   | 0         | 0    | 3   | 1   | 2     | 0  | 0      | 2     |
| 5**       | R  |     | 0        | 0     | 1      | 0  | 1   | 0      | 0  | 1   | 0         | 0    | 0   | 0   | 0     | 0  | 0      | 0     |
|           | L  |     | 0        | 0     | 0      | 0  | 0   | 0      | 0  | 1   | 0         | 0    | 0   | 0   | 0     | 0  | 0      | 0     |
| 6*        | R  |     | 0        | 1     | 0      | 0  | 0   | 0      | 0  | 0   | 0         | 0    | 1   | 0   | 0     | 0  | 0      | 0     |
|           | L  |     | 0        | 0     | 2      | 1  | 0   | 0      | 0  | 0   | 0         | 0    | 0   | 0   | 0     | 0  | 0      | 0     |
| 6**       | R  |     | 0        | 0     | 0      | 0  | 0   | 0      | 0  | 0   | 0         | 0    | 0   | 0   | 0     | 0  | 0      | 0     |
|           | L  |     | 0        | 0     | 0      | 0  | 0   | 0      | 0  | 0   | 0         | 0    | 0   | 0   | 0     | 0  | 0      | 0     |
| 7         | R  |     | 0        | 0     | 0      | 1  | 0   | 2      | 2  | 2   | 0         | 0    | 1   | 1   | 1     | 0  | 0      | 0     |
|           | L  |     | 0        | 0     | 0      | 0  | 0   | 1      | 0  | 2   | 0         | 0    | 1   | 2   | 2     | 0  | 0      | 0     |
| 8         | R  |     | 0        | 2     | 2      | 2  | 1   | 2      | 2  | 2   | 0         | 0    | 1   | 0   | 2     | 0  | 0      | 0     |
|           | L  |     | 0        | 2     | 2      | 2  | 1   | 0      | 0  | 0   | 0         | 0    | 0   | 0   | 1     | 0  | 0      | 0     |
| 9         | R  |     | 0        | 0     | 0      | 0  | 0   | 0      | 0  | 0   | 0         | 0    | 0   | 0   | 0     | 0  | 0      | 0     |
|           | L  |     | 0        | 0     | 0      | 0  | 0   | 0      | 0  | 0   | 0         | 0    | 0   | 0   | 0     | 0  | 0      | 0     |
| 10        | R  |     | 0        | 0     | 0      | 0  | 0   | 0      | 0  | 0   | 0         | 0    | 0   | 0   | 0     | 0  | 0      | 0     |
|           | L  |     | 0        | 0     | 0      | 0  | 0   | 0      | 0  | 0   | 0         | 0    | 0   | 0   | 0     | 0  | 0      | 0     |

Grade 0
  Grade 1
  Grade 2
  Grade 3
